# Supplementary material
Source: PubMed Central journal article supplement (PMC7357980)
Supplement: mmc1.pdf [file mmc1.pdf]

# THE LANCET

## Public Health

### **Supplementary appendix**

This appendix formed part of the original submission. We post it as supplied by the authors.

Supplement to: Arbyn M, Bruni L, Kelly D, et al. Tackling cervical cancer in Europe amidst the COVID-19 pandemic. *Lancet Public Health* 2020; published online July 13. [https://doi.org/10.1016/2468-2667\(20\)30122-5](https://doi.org/10.1016/2468-2667(20)30122-5).

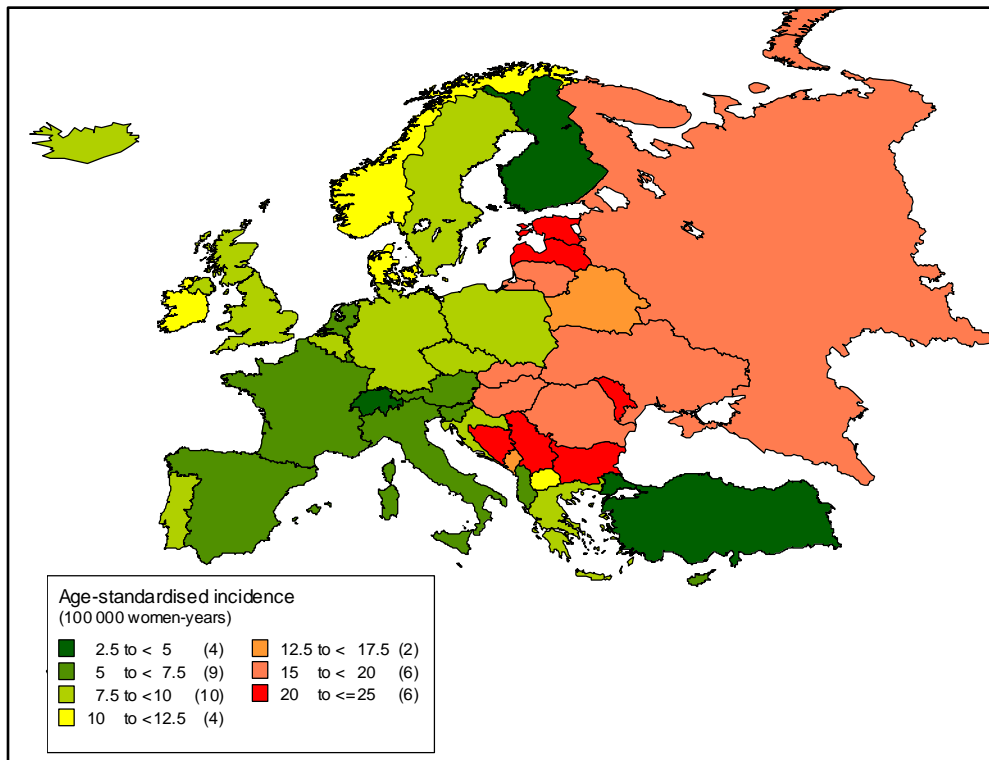

**Figure .** Geographical distribution of the world age-standardised incidence rate of cervical cancer by country, in Europe (+ Cyprus & Turkey), estimated for 2018 (source IARC, GLOBOCAN 2018)<sup>1</sup>.

#### Reference

1. Arbyn M, Weiderpass E, Bruni L, et al. Estimates of incidence and mortality of cervical cancer in 2018: a worldwide analysis. *Lancet Glob Health* 2020;**8**: e191-e120.
